# Supplementary material for: Carbon-ion Evokes Metabolic Reprogramming and Individualized Response in Prostate Cancer
Source: Research Square preprint supplement (doi:10.21203/rs.3.rs-604086/v1), 2021-06-15
Supplement: Supplementary file 1 [file 06d4935174e0edcae5cfaa87.docx]

**SUPPLEMENTARY FIGURES**


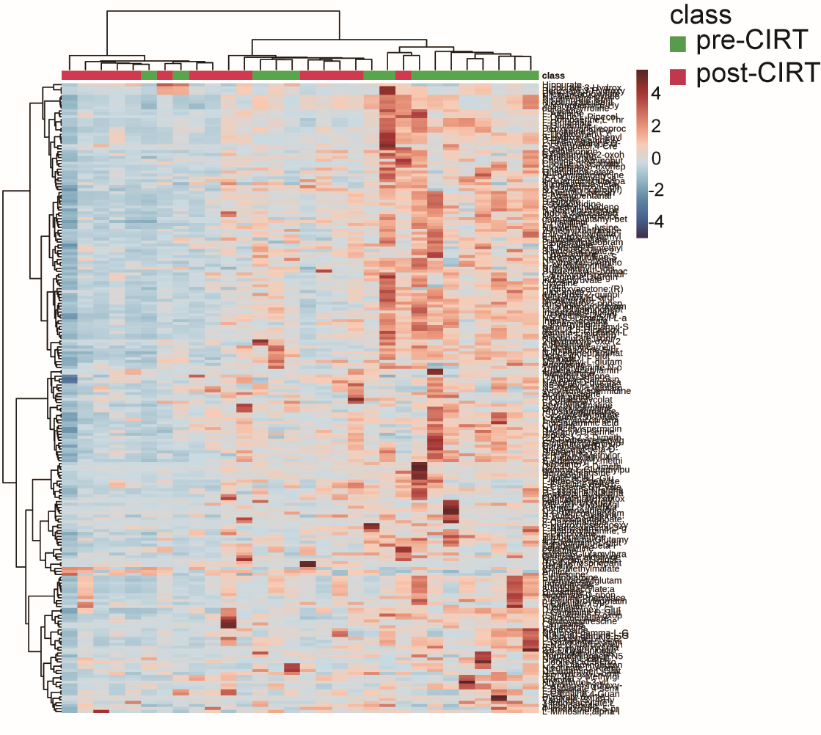


**Supplementary figure 1**

Hierarchical clustering analysis of all samples. Pre-CIRT is green (n=15) and post-CIRT is red (n=15)


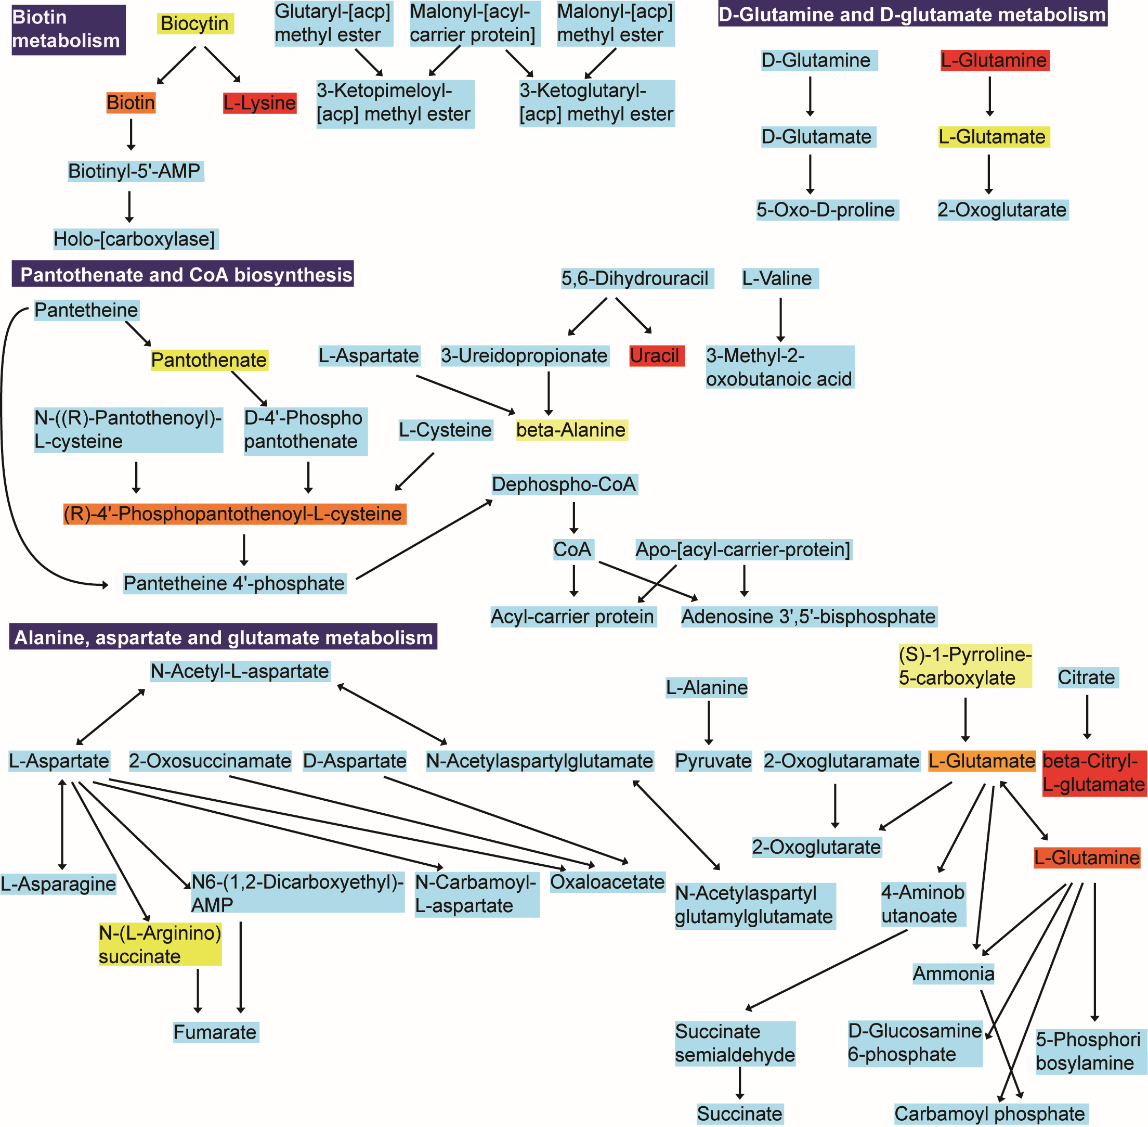


**Supplementary figure 2**

Identified compound within the pathway of biotin metabolism, D-Glutamine and D-glutamate metabolism, pantothenate and CoA biosynthesis, alanine, aspartate and glutamate metabolism. Light blue means those metabolites are not in our data and are used as background for enrichment analysis; other colors (varying from yellow to red) means the metabolites are in the data with different levels of significance.


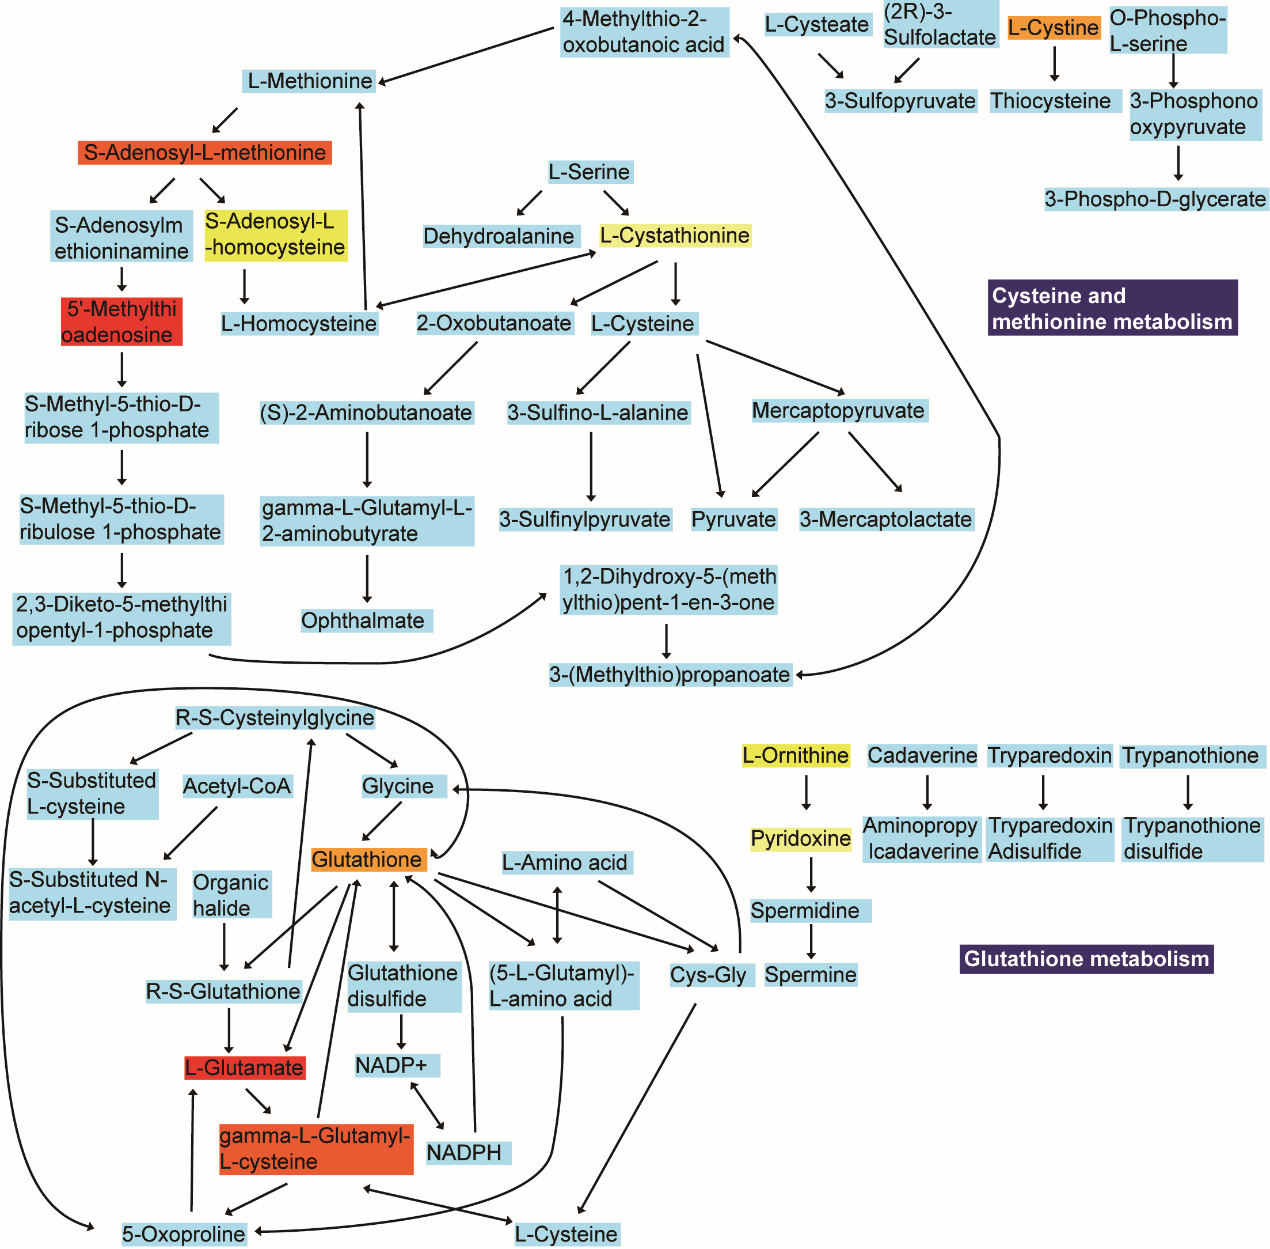


**Supplementary figure 3**

Identified compound within the pathway of glutathione metabolism, cysteine and methionine metabolism. Light blue means those metabolites are not in our data and are used as background for enrichment analysis; other colors (varying from yellow to red) means the metabolites are in the data with different levels of significance.
